# Supplementary material
Source: PubMed Central journal article supplement (PMC7281355)
Supplement: jamapediatr-174-764-s001.pdf [file jamapediatr-174-764-s001.pdf]

## Supplementary Online Content

Hill KG, Bailey JA, Steeger CM, et al. Outcomes of childhood preventive intervention across 2 generations: a nonrandomized controlled trial. *JAMA Pediatr*. Published online June 8, 2020. Doi:10.1001/jamapediatrics.2020.1310

**eTable 1.** Characteristics of Control and Full Intervention Groups at Baseline and at Age 30 Follow-Up, Full SSDP Sample (reproduced from Hawkins, et al., 1999).

**eTable 2.** Sensitivity Table.

**eFigure.** Results: Child developmental outcomes (2002-2011) for offspring whose parents were in the control group (grey) or in the Raising Healthy Children intervention (black) as children in grades 1-6, 1980-1986.

This supplementary material has been provided by the authors to give readers additional information about their work.

**eTable 1. Characteristics of Control and Full Intervention Groups at Baseline and at Age 30 Follow-Up, Full SSDP Sample (reproduced from Hawkins, et al., 1999).**

| <u>Full Sample</u>                            | <u>Baseline (1985)</u> |             |                                 |                | <u>Age 30 follow-up (2005)</u> |              |                                 |                |
|-----------------------------------------------|------------------------|-------------|---------------------------------|----------------|--------------------------------|--------------|---------------------------------|----------------|
|                                               | <u>Control</u>         | <u>Full</u> | <u>statistic</u>                | <u>p-value</u> | <u>Control</u>                 | <u>Full</u>  | <u>Statistic</u>                | <u>p-value</u> |
| Gender (male)                                 | 53.3%                  | 52.7%       | $\chi^2=0.00$                   | 1.000          | 52.2%                          | 53.1%        | $\chi^2=0.02$                   | 0.962          |
| Caucasian (v. other)                          | 46.2%                  | 49.3%       | $\chi^2=0.22$                   | 0.640          | 48.9%                          | 51.5%        | $\chi^2=0.12$                   | 0.732          |
| Percent eligible for school lunch program     | 56.1%                  | 55.5%       | $\chi^2=0.00$                   | 0.989          | 53.2%                          | 53.8%        | $\chi^2=0.00$                   | 1.000          |
| Percent single-parent families                | 59.8%                  | 59.3%       | $\chi^2=0.00$                   | 1.000          | 59.6%                          | 58.9%        | $\chi^2=0.00$                   | 1.000          |
| <b>Percent of G2 born to a G1 teen mother</b> | <b>19.3%</b>           | <b>8.9%</b> | <b><math>\chi^2=6.56</math></b> | <b>0.004</b>   | <b>21.5%</b>                   | <b>10.0%</b> | <b><math>\chi^2=6.46</math></b> | <b>0.011</b>   |
| Mean years living in town (by age 12)         | 10.6                   | 11.1        | t(318)=1.16                     | 0.246          | 10.8                           | 11.2         | t(279)=0.90                     | 0.370          |
| Neighborhood disorganization                  | 0.026                  | 0.039       | t(336)=0.15                     | 0.882          | 0.014                          | 0.051        | t(299)=0.38                     | 0.702          |

| <b>eTable 2. Sensitivity Table.</b> Analyses including "cannot classify" participants into the full treatment group. Differences in children of parents who were in full intervention in grades 1-6 compared to control. Analyses across all ages, all seven waves of assessment of G3 |                   |      |  |      |          |
|----------------------------------------------------------------------------------------------------------------------------------------------------------------------------------------------------------------------------------------------------------------------------------------|-------------------|------|--|------|----------|
|                                                                                                                                                                                                                                                                                        | Standardized Beta |      |  | p <  | FDR sig? |
| <b>Developmental Functioning (ASQ)</b>                                                                                                                                                                                                                                                 |                   |      |  |      |          |
| <b>Ages 1-5 yrs <sup>a</sup></b>                                                                                                                                                                                                                                                       |                   |      |  |      |          |
| Communication                                                                                                                                                                                                                                                                          |                   | .53  |  | 0.01 | Y        |
| Gross Motor                                                                                                                                                                                                                                                                            |                   | .48  |  | 0.01 | Y        |
| Fine Motor                                                                                                                                                                                                                                                                             |                   | .45  |  | 0.01 | Y        |
| Problem Solving                                                                                                                                                                                                                                                                        |                   | .19  |  | 0.34 | N        |
| Personal Social                                                                                                                                                                                                                                                                        |                   | .11  |  | 0.53 | N        |
| Across All Areas                                                                                                                                                                                                                                                                       |                   | .48  |  | 0.01 | Y        |
| <b>Teacher-Rated Child Behavior</b>                                                                                                                                                                                                                                                    |                   |      |  |      |          |
| <b>Ages 6-18 yrs <sup>d</sup></b>                                                                                                                                                                                                                                                      |                   |      |  |      |          |
| Oppositional Defiant (OD)                                                                                                                                                                                                                                                              |                   | -.31 |  | 0.02 | Y        |
| Conduct Problems (CD)                                                                                                                                                                                                                                                                  |                   | -.18 |  | 0.22 | N        |
| Attention Deficit/(ADHD)                                                                                                                                                                                                                                                               |                   | -.38 |  | 0.01 | Y        |
| Social Problems (SOCP)                                                                                                                                                                                                                                                                 |                   | -.14 |  | 0.45 | N        |
| Anxiety (ANX)                                                                                                                                                                                                                                                                          |                   | -.19 |  | 0.20 | N        |
| Affective Problems (AFP)                                                                                                                                                                                                                                                               |                   | -.33 |  | 0.03 | N        |
| Externalizing (OD, CD, ADHD)                                                                                                                                                                                                                                                           |                   | -.31 |  | 0.02 | Y        |
| Internalizing (SOCP, ANX, AFP)                                                                                                                                                                                                                                                         |                   | -.30 |  | 0.07 | N        |
| <b>Teacher Rated Skills and Performance</b>                                                                                                                                                                                                                                            |                   |      |  |      |          |
| <b>Ages 6-18 <sup>a</sup></b>                                                                                                                                                                                                                                                          |                   |      |  |      |          |
| Cognitive skills                                                                                                                                                                                                                                                                       |                   | 0.34 |  | 0.02 | Y        |
| Academic skills                                                                                                                                                                                                                                                                        |                   | 0.32 |  | 0.02 | Y        |
| Relative acad. performance                                                                                                                                                                                                                                                             |                   | 0.19 |  | 0.14 | N        |
| Grades (mostly Fs to As, 0 to 4)                                                                                                                                                                                                                                                       |                   | 0.16 |  | 0.24 | N        |
| Emotional skills                                                                                                                                                                                                                                                                       |                   | 0.44 |  | 0.01 | Y        |
| <b>Child Self-Report Risk Behavior</b>                                                                                                                                                                                                                                                 |                   |      |  |      |          |
| <b>Ages 6-18 <sup>e</sup></b>                                                                                                                                                                                                                                                          |                   |      |  |      |          |
|                                                                                                                                                                                                                                                                                        | OR                |      |  | p <  | FDR sig? |
| Early sex (< 17yrs)                                                                                                                                                                                                                                                                    |                   | 0.50 |  | 0.14 | N        |
| Ever drank alcohol                                                                                                                                                                                                                                                                     |                   | 0.44 |  | 0.05 | N        |
| Ever smoked cigarettes                                                                                                                                                                                                                                                                 |                   | 0.55 |  | 0.21 | N        |
| Ever smoked marijuana                                                                                                                                                                                                                                                                  |                   | 0.69 |  | 0.42 | N        |
| Ever tried any drug                                                                                                                                                                                                                                                                    |                   | 0.25 |  | 0.01 | Y        |
| Ever vio (fight, hit, beat, rob)                                                                                                                                                                                                                                                       |                   | 0.64 |  | 0.18 | N        |
| Ever nonvio (theft, drug sales)                                                                                                                                                                                                                                                        |                   | 0.70 |  | 0.49 | N        |

Note. All analyses controlling for maternal age at childbirth and cohort clustering. Rows in bold indicate significance after applying Benjamini-Hochberg False-Discovery Rate (FDR) multiple comparisons adjustment. **a:** Mean score across all ages available for each measure, and across all 7 waves; **b:** Beta

for standardized outcome (STDY); **c**: Statistically significant after applying FDR adjustment? FDR significance level: 0.0211; **d**: Standardized within age. **e**. cumulative across waves. **f**. Odds Ratio

**eFigure. Results: Child developmental outcomes (2002-2011) for offspring whose parents were in the control group (grey) or in the Raising Healthy Children intervention (black) as children in grades 1-6, 1980-1986**

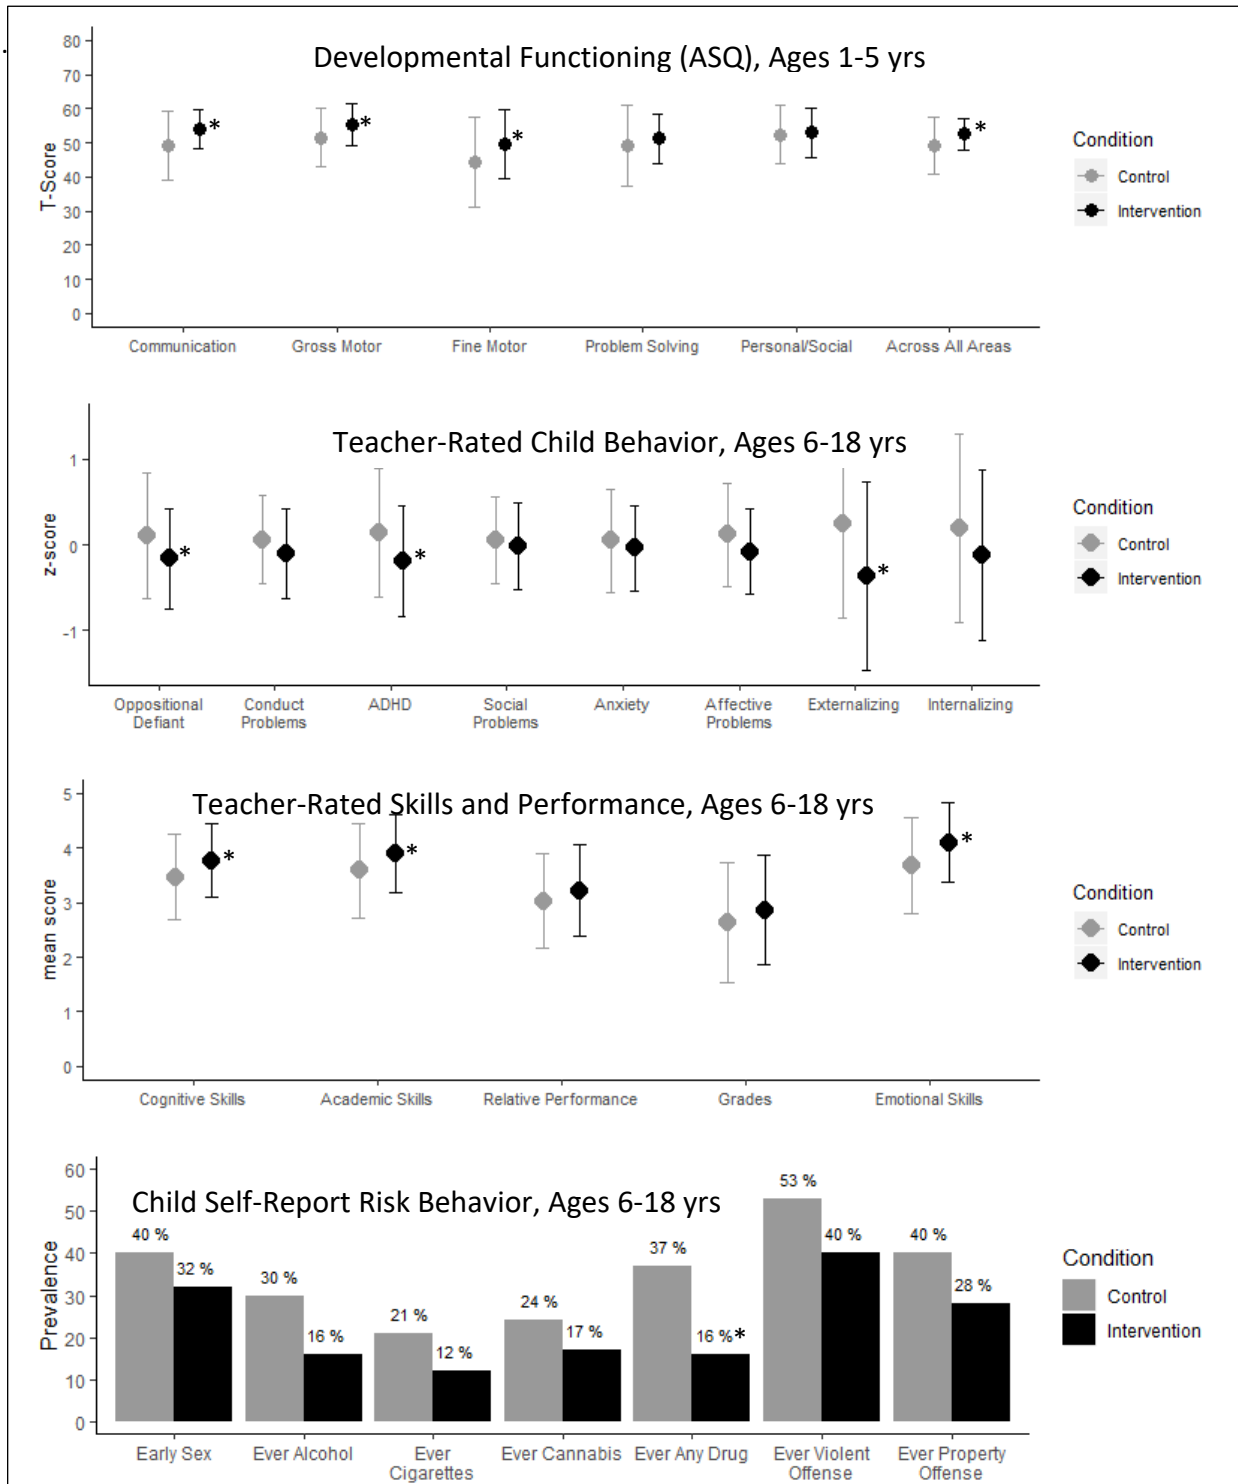

\* Statistically significant at  $p < .05$  or better after applying Benjamini-Hochberg multiple comparisons adjustment. Error bars reflect standard deviation units around each mean.
